# Supplementary material for: Hyperbranched poly(phosphoester)s as flame retardants for technical and high performance polymers
Source: Royal Society of Chemistry journal article supplement (doi:10.1039/c4py00830h), 2014-09-08
Supplement: c4py00830h1.pdf [file c4py00830h1.pdf]

## Supporting Info

### Methods

Matrix-assisted laser desorption and ionization time-of-flight (MALDI-ToF) measurements were obtained with a Shimadzu Axima CFR MALDI-ToF mass spectrometer, equipped with a nitrogen laser delivering 3 ns laser pulses at 337 nm. Dithranol (1,8,9-tris-hydroxy-anthracene) was used as a matrix. Samples were prepared by dissolving the polymer in  $\text{CHCl}_3$  at a concentration of  $10 \text{ g L}^{-1}$ . A 10 mL aliquot of this solution was added to 10 mL of a  $10 \text{ g L}^{-1}$  matrix solution and 1 mL of a potassium trifluoroacetic acid (KTFA) solution (0.1 M in methanol as a cationization agent). A 1 mL aliquot of the resulting mixture was applied to a multistage target to evaporate  $\text{CHCl}_3$  and create a thin matrix/analyte film. The samples were measured in positive-ion mode and in the linear mode of the spectrometer. Gel-permeation chromatography (GPC) measurements were carried out in THF, with samples at a concentration of  $1 \text{ g L}^{-1}$ . Sample injection was performed by a 717 plus auto sampler (Waters) at  $30^\circ\text{C}$  (THF). Flow was  $1 \text{ mL min}^{-1}$ . In THF, three SDV columns (PSS) were employed with the dimensions  $300 \times 80 \text{ mm}$ ,  $10 \mu\text{m}$  particle size and pore sizes of 106, 104 und  $500 \text{ \AA}$ . Detection was accomplished with DRI Shodex RI-101 detector (ERC) and UV-Vis S-3702 detector (Soma). Calibration was carried out using polystyrene standards provided by Polymer Standards Service.

**Table S1** ATMET polymerizations: reaction conditions and molecular weights

| Monomer | Catalyst<br>[a] | Polymer     | Reaction time<br>[hr] | Temperature<br>[°C] | Ethylene removal | Mw<br>[b] | Mn<br>[b] | Mw/Mn<br>[b] |
|---------|-----------------|-------------|-----------------------|---------------------|------------------|-----------|-----------|--------------|
| 1       | 2% G1           | P1          | 1                     | 80                  | Vacuum           | 3,000     | 1,600     | 2.5          |
| 1       | 2% G1           | P1          | 12                    | 80                  | Vacuum           |           | gelation  |              |
| 1       | 1.2% G1         | P1          | 2                     | 60                  | Vacuum           |           | Oligomers |              |
| 1       | 1.2% G1         | No reaction | 2                     | r.t.                | Vacuum           |           |           |              |
| 1       | 0.5% G1         | P1          | 0.5                   | 80                  | Vacuum           | 2,500     | 1,000     | 2.5          |

[a] Grubbs catalyst 1st generation. [b] GPC in THF vs polystyrene standards

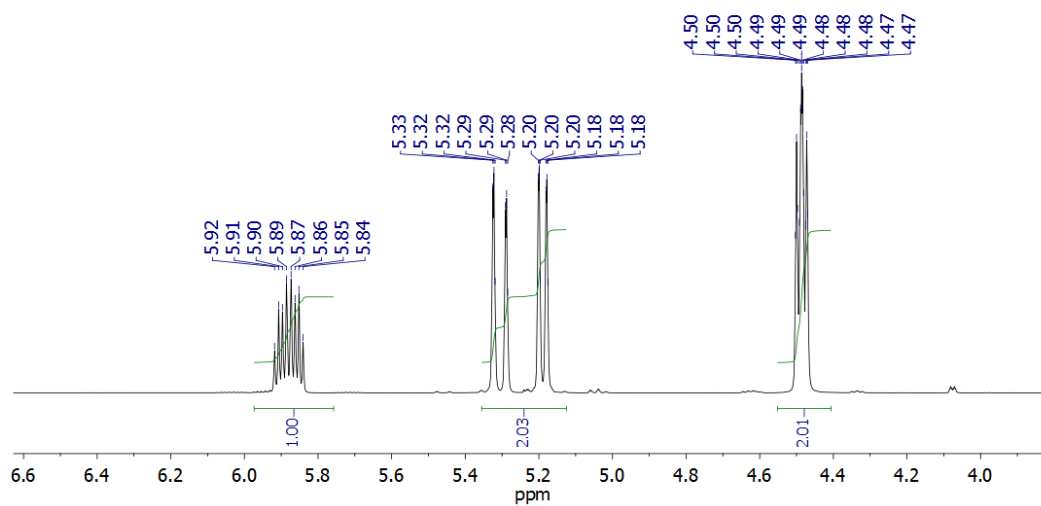

**Fig. S1** <sup>1</sup>H NMR of triallyl-phosphate (500 MHz, 298 K, CDCl<sub>3</sub>).

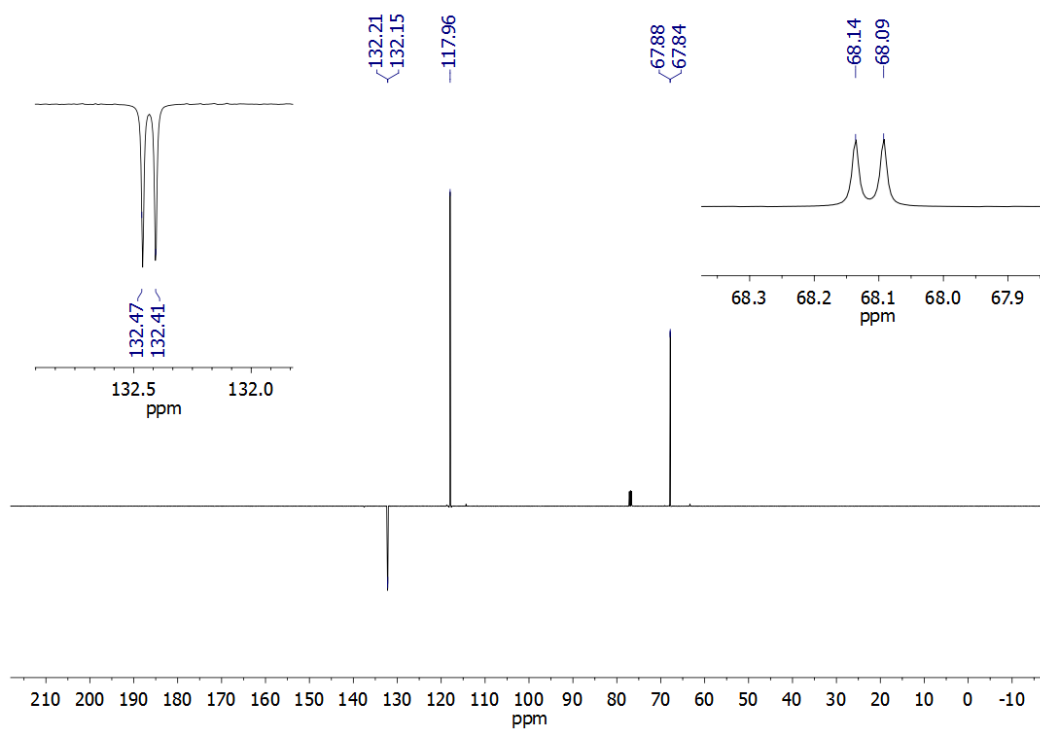

**Fig. S2** <sup>13</sup>C NMR of triallyl-phosphate (126 MHz, 298 K, CDCl<sub>3</sub>).

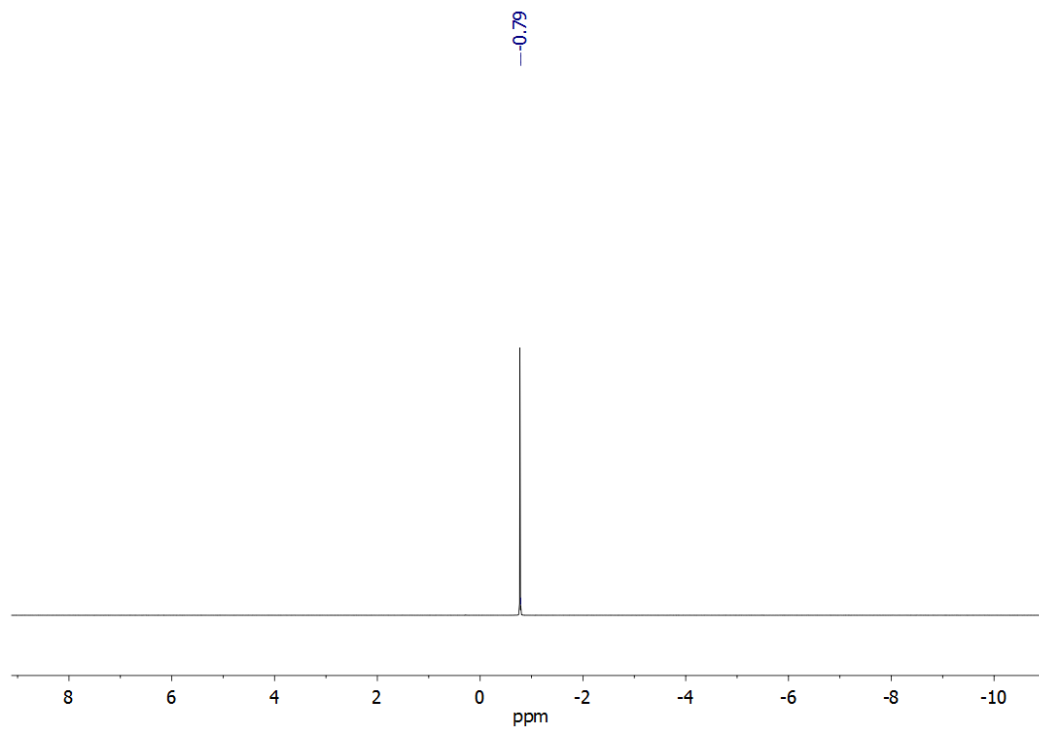

**Fig. S3**  $^{31}\text{P}$  NMR of triallyl-phosphate (202 MHz, 298 K,  $\text{CDCl}_3$ ).

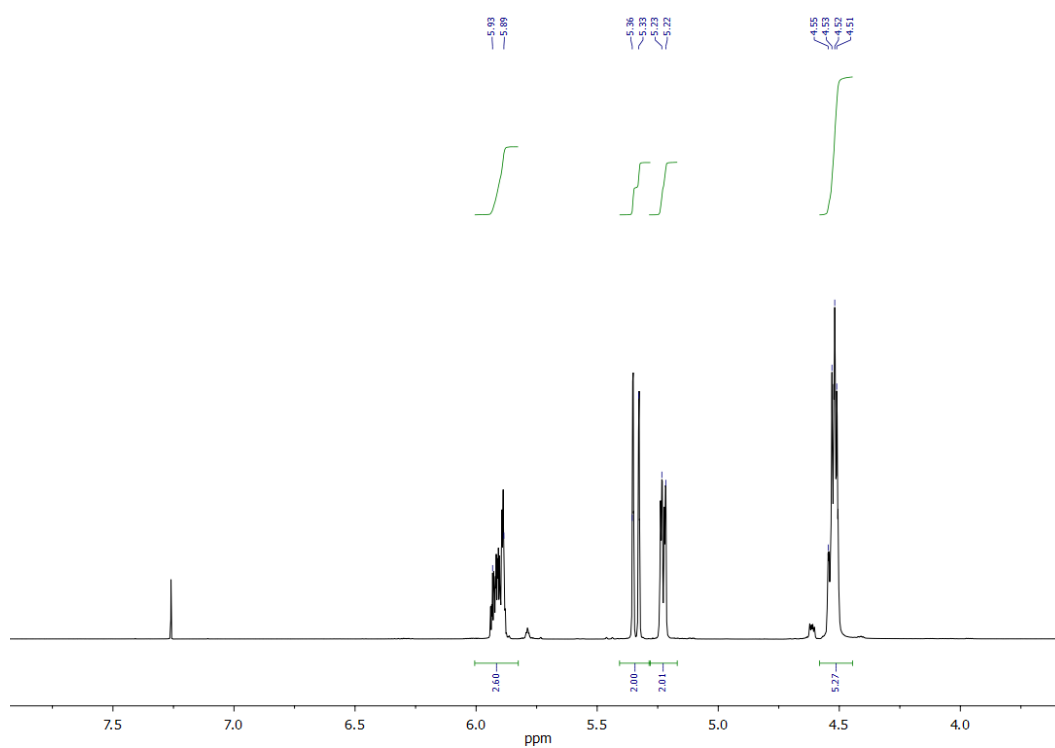

**Fig. S4**  $^1\text{H}$  NMR of **P1** (700 MHz, 298 K,  $\text{CDCl}_3$ ).

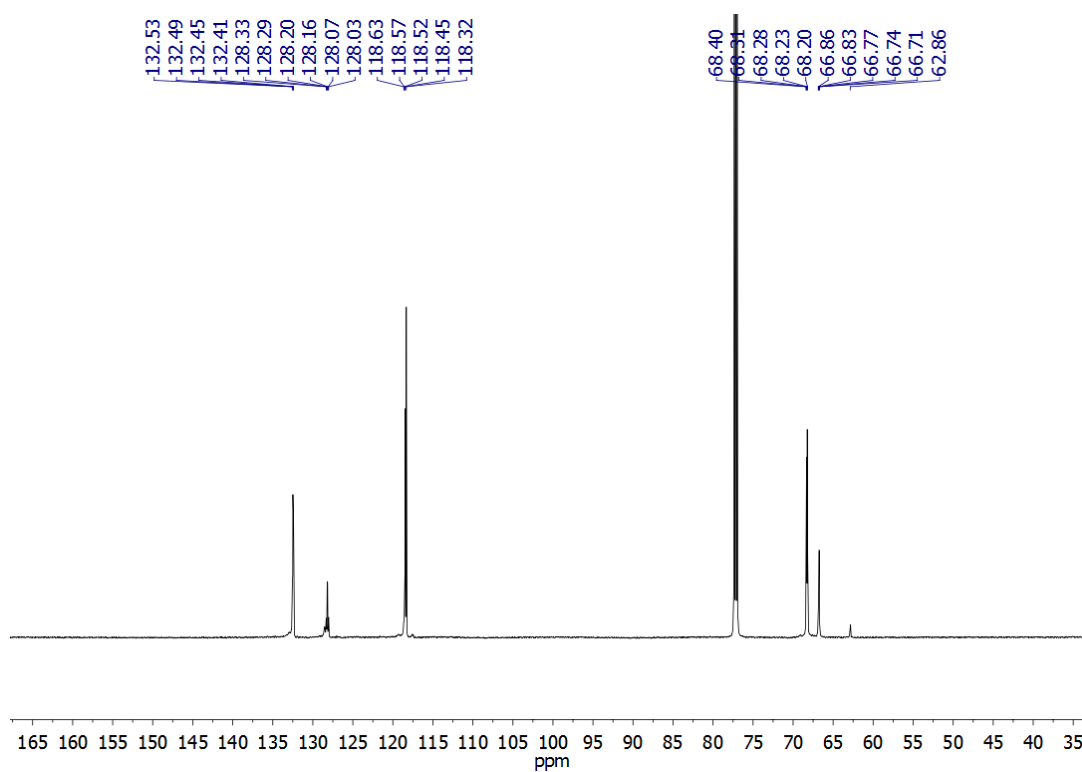

**Fig. S5** <sup>13</sup>C NMR of **P1** (176 MHz, 298 K, CDCl<sub>3</sub>).

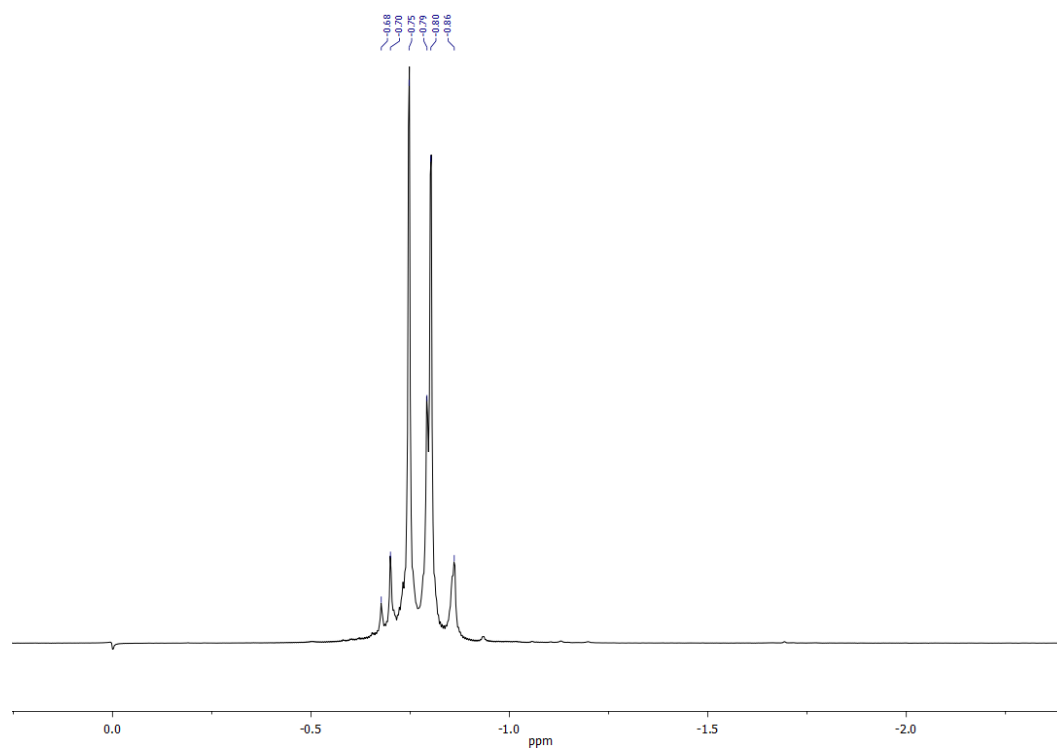

**Fig. S6** <sup>31</sup>P NMR of **P1** (283 MHz, 298 K, CDCl<sub>3</sub>).

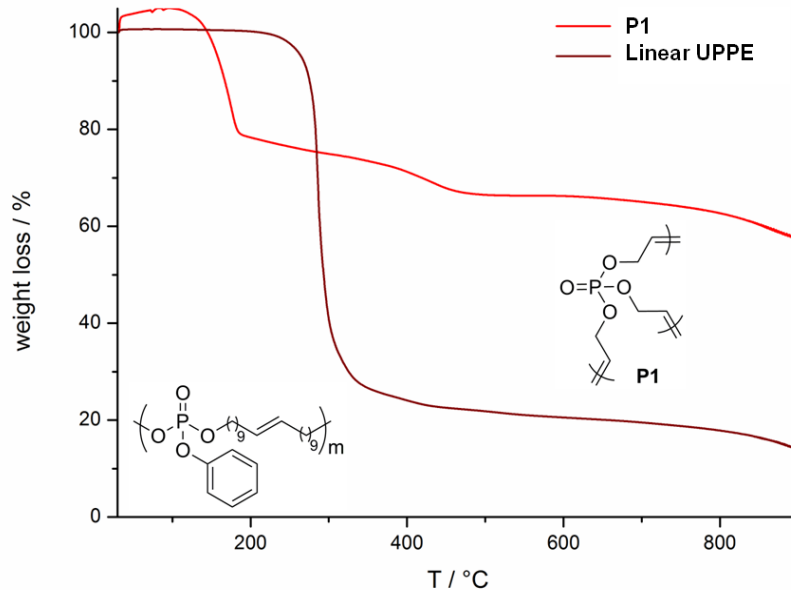

**Fig. S7** TGA comparison between **P1** and a linear unsaturated polyphosphoester (UPPE).

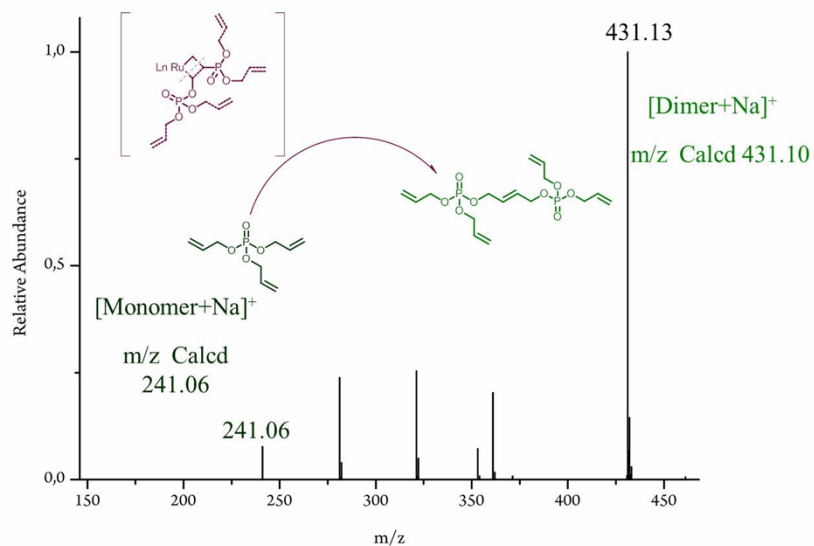

**Fig. S8** Evidence of dimeric structure from ESI-MS: early metathesis step.

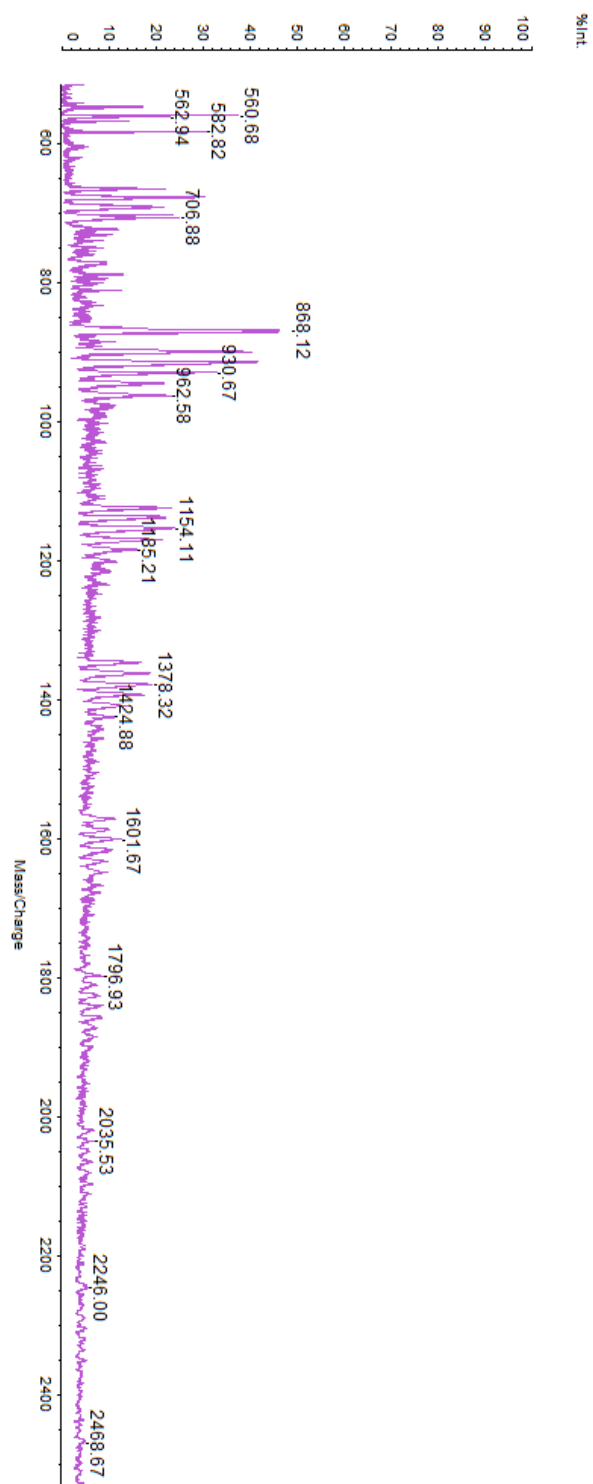

**Fig. S9** MALDI spectrum of **P1**. (Dithranol was used as a matrix and potassium trifluoroacetic acid (KTFA) as a cationization agent)

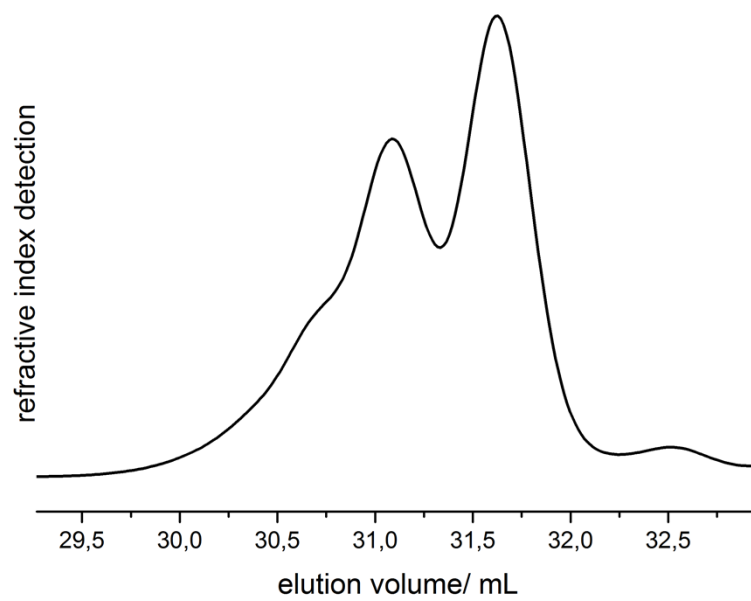

**Fig. S10** Representative GPC chromatogram of **P1** in THF.
